# Supplementary material for: High-temperature Dirac half-metal PdCl3: a promising candidate for realizing quantum anomalous Hall effect
Source: Royal Society of Chemistry journal article supplement (doi:10.1039/c8tc02500b), 2018-01-01
Supplement: c8tc02500b1.pdf [file c8tc02500b1.pdf]

## Supporting information

### High-Temperature Dirac Half-Metal Material: A Promising Candidate for Realizing Quantum Anomalous Hall Effect

Ya-ping Wang,<sup>1,3</sup> Sheng-shi Li,<sup>1,2</sup> Chang-wen Zhang,<sup>1\*</sup> and Pei-ji Wang<sup>1</sup>

1 School of Physics and Technology, University of Jinan, Jinan, Shandong, 250022, People's Republic of China

2 School of Physics, State Key laboratory of Crystal Materials, Shandong University, Jinan, Shandong, 250100, People's Republic of China

3 Advanced Materials Institute, Qilu University of Technology (Shandong Academy of Science), Jinan, Shandong, 250014, People's Republic of China

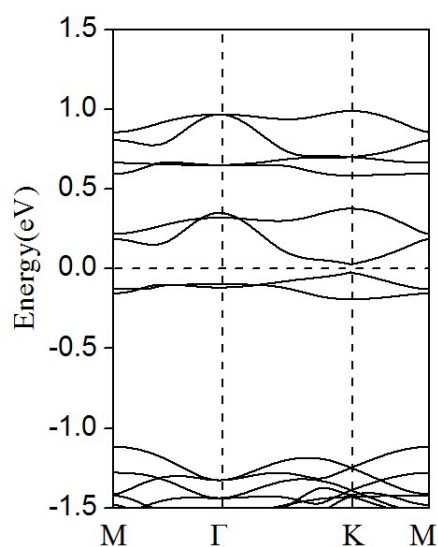

Fig. S1 Band structure of PdCl<sub>3</sub> lattice calculated with HSE method. One can see that it has a band gap of 63.2 meV, which is comparable to the result from  $U = 3.5$  eV in the GGA+U calculations.
